# Supplementary material
Source: PubMed Central journal article supplement (PMC4025946)
Supplement: NIHMS576030-supplement-2.pdf [file NIHMS576030-supplement-2.pdf]

Low Intensity

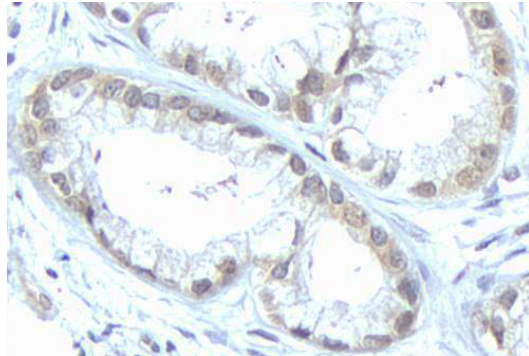

High Intensity

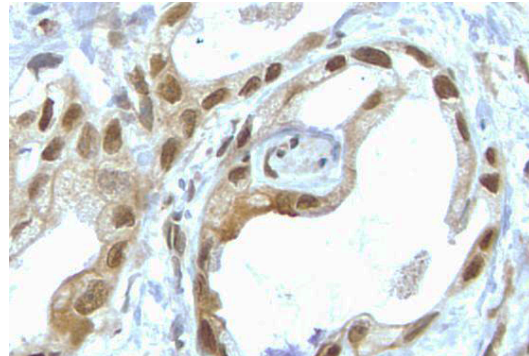

**Supplemental Figure S1**

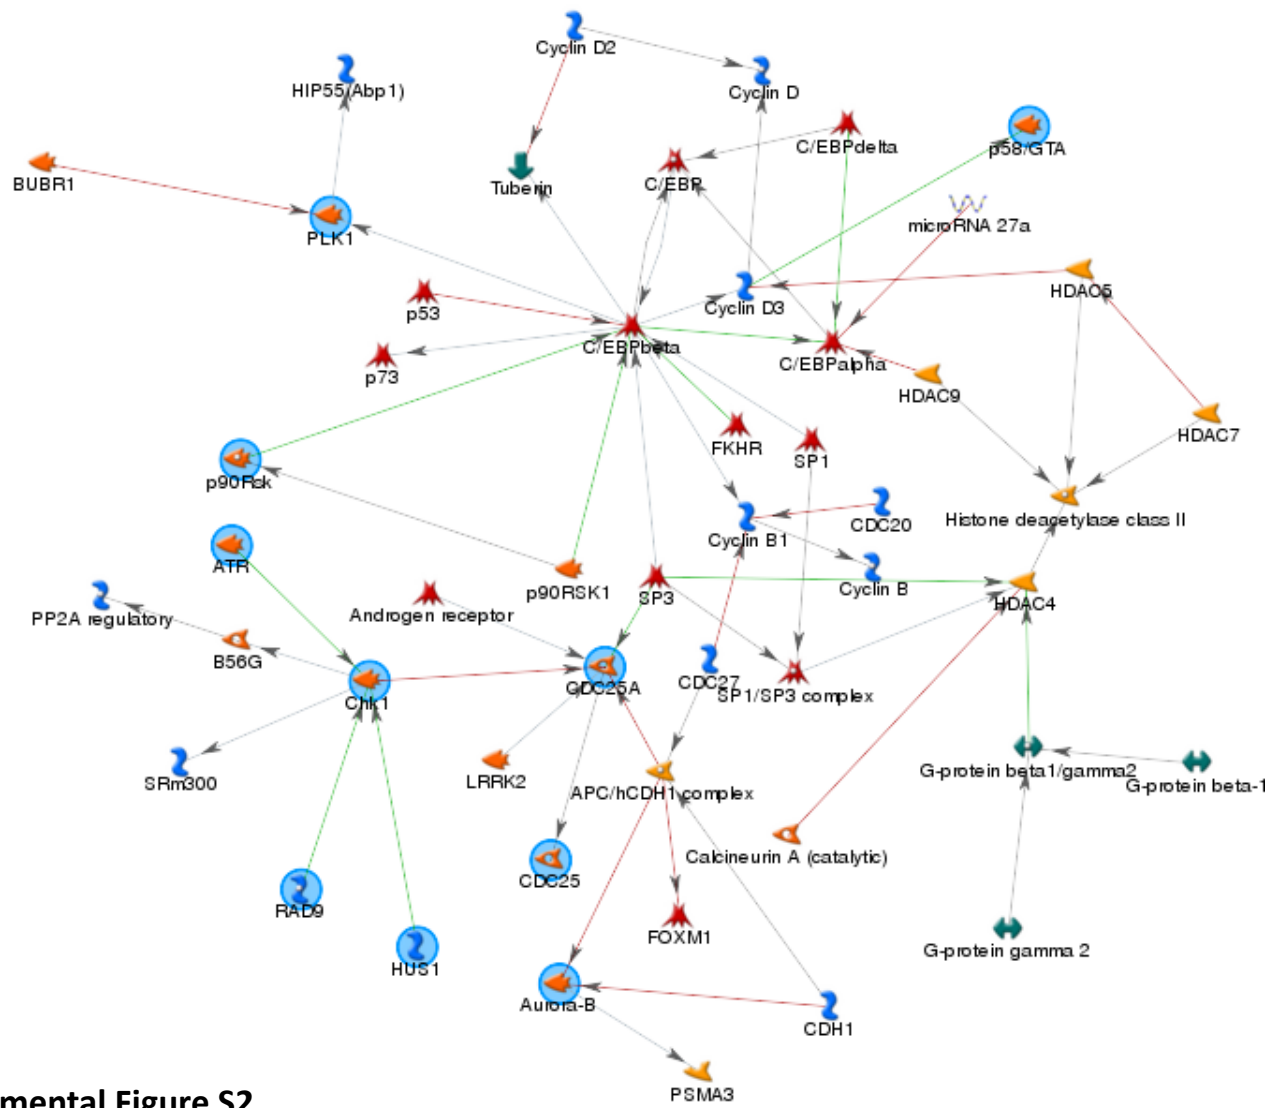

Supplemental Figure S2

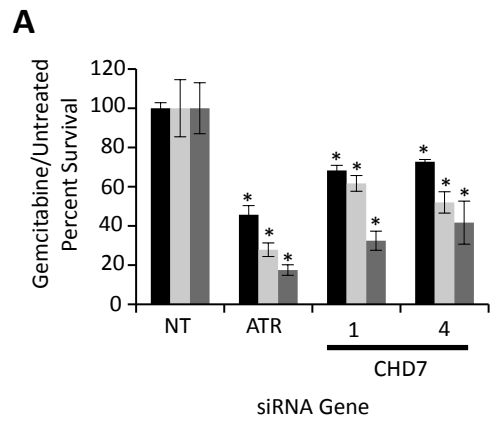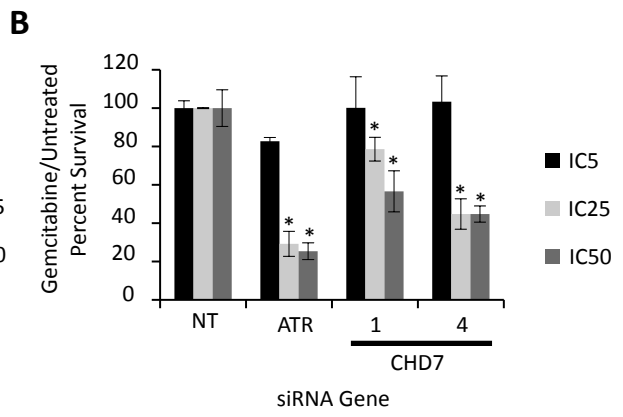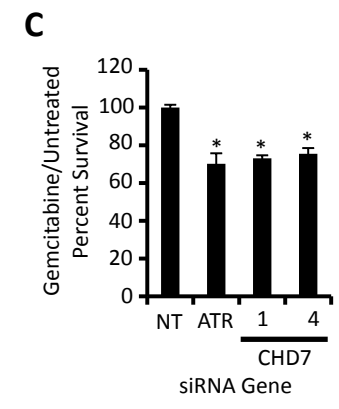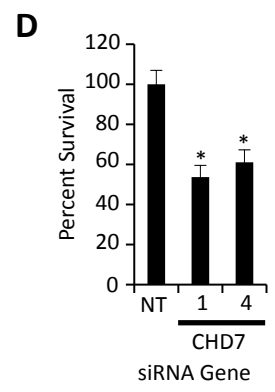

Supplemental Figure S3

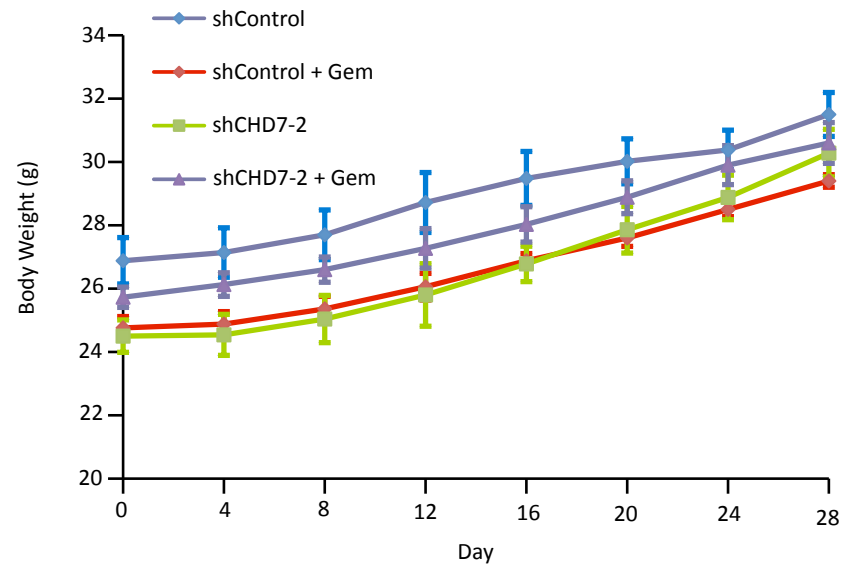

Supplemental Figure S4

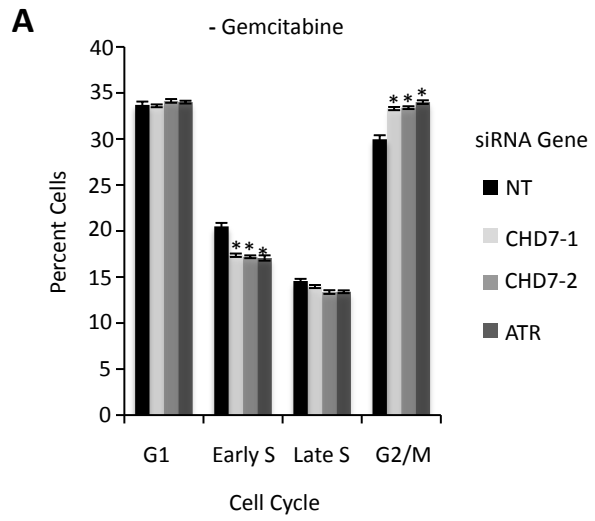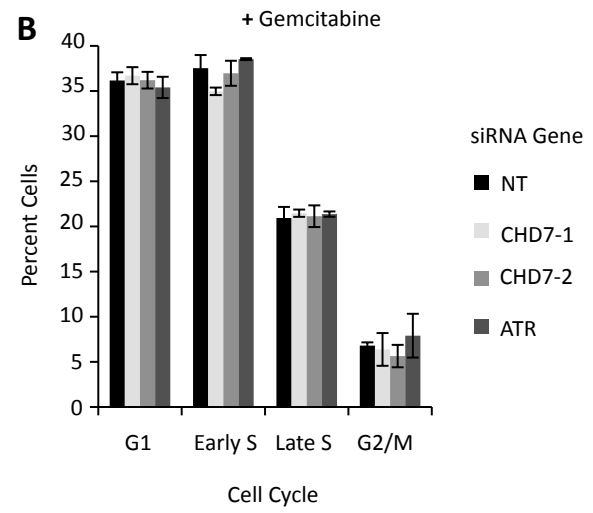

Supplemental Figure S5

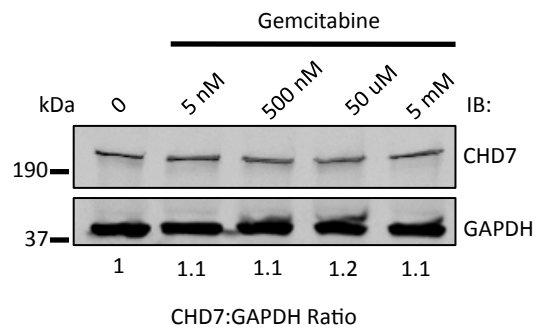

Supplemental Figure S6
